# Supplementary material
Source: Springer Nature journal article supplement (https://www.springermedizin.de/resource/supplementary/12984_2008_199_MOESM6_ESM.pdf/9605512)
Supplement: MOESM6 [file 9605512]

### Analysis Windows of Significant Activation

Maximum  
Classification  
Accuracy

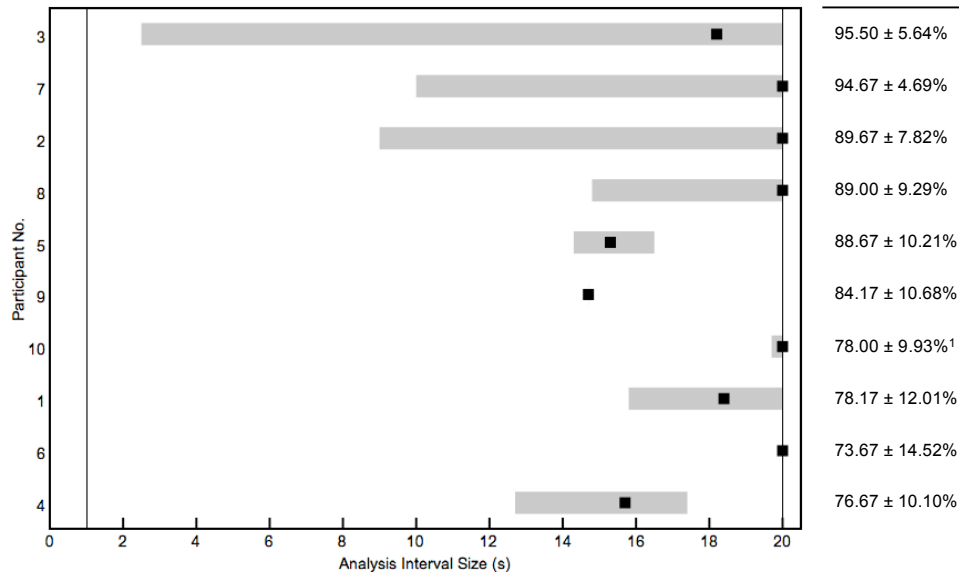

<sup>1</sup>The number of possible decomposition levels increases with  $\Delta T$ . In lieu of  $E_{d6}$ , the lowest decomposition level available for each value of  $\Delta T$  was used to calculate classification accuracy
